# Supplementary material for: Spatial and temporal dynamics of the bacterial community under experimental warming in field-grown wheat
Source: PeerJ. 2023 Jun 14;11:e15428. doi: 10.7717/peerj.15428 (PMC10276554; doi:10.7717/peerj.15428)
Supplement: Supplemental Information 7 [file peerj-11-15428-s007.xlsx]

## Sheet: Sheet1
Soil moisture
Treatment	Tillering	Jointing	Ripening		averge				SD				P
Control.1	0.163333	0.17811	0.17372			0.145415	0.177319	0.180429		0.0156465	0.00676521	0.00609711		0.054	<0.001	0.002
Control.2	0.138457	0.170193	0.181934
Control.3	0.134454	0.183654	0.185633
Warmed.1	0.123297	0.133333	0.149924			0.119842	0.125243	0.149523		0.00475313	0.00711422	0.00401243
Warmed.2	0.114421	0.122429	0.145324
Warmed.3	0.121806	0.119966	0.153319
pH
Treatment	Tillering	Jointing	Ripening		averge				SD				P
Control.1	7.79	7.94	8.04			7.79667	7.91333	8.02333		0.0404145	0.0378594	0.0472582		0.006	0.072	0.06
Control.2	7.76	7.93	7.97
Control.3	7.84	7.87	8.06
Warmed.1	7.91	7.8	8.18			7.93667	7.84	8.13667		0.023094	0.0360555	0.0585947
Warmed.2	7.95	7.87	8.07
Warmed.3	7.95	7.85	8.16
