# Supplementary material for: Spatial and temporal dynamics of the bacterial community under experimental warming in field-grown wheat
Source: PeerJ. 2023 Jun 14;11:e15428. doi: 10.7717/peerj.15428 (PMC10276554; doi:10.7717/peerj.15428)
Supplement: Supplemental Information 8 [file peerj-11-15428-s008.xlsx]

## Sheet: Sheet1
Dissolved organic carbon
Treatment	Tillering	Jointing	Ripening		averge				SD				P
Control.1	3.64615	10.4924	43.1241			4.66521	10.3259	43.1179		1.01906	0.166425	0.00618603		<0.001	0.16	<0.001
Control.2	4.66521	10.1595	43.1117
Control.3	5.68427	10.3259	43.1179
Warmed.1	13.6036	10.3418	47.1142			15.2606	11.0568	48.0945		1.65696	0.715017	0.980304
Warmed.2	16.9175	11.0568	48.0945
Warmed.3	15.2606	11.7719	49.0748
Soil dehydrogenase activity
Treatment	Tillering	Jointing	Ripening		averge				SD				P
Control.1	16.6067	26.2016	41.6203			16.4074	28.1571	38.7654		1.18504	1.95867	2.82655		0.01	0.007	0.008
Control.2	15.1353	30.1189	35.968
Control.3	17.4801	28.1509	38.7078
Warmed.1	19.5799	34.0261	46.4809			20.785	34.0198	47.975		1.14478	0.0595772	1.4849
Warmed.2	20.9173	34.076	47.9937
Warmed.3	21.8579	33.9573	49.4505
